# Supplementary material for: Assembling semiconductor quantum dots in hierarchical photonic cellulose nanocrystal films: circularly polarized luminescent nanomaterials as optical coding labels
Source: Royal Society of Chemistry journal article supplement (doi:10.1039/c9tc04144c), 2019-01-01
Supplement: c9tc04144c1.pdf [file c9tc04144c1.pdf]

**Electronic Supplementary Material (ESI) for Journal of Materials Chemistry C.**

**This journal is © The Royal Society of Chemistry 2019**

## **Supporting information**

### **Assembling semiconductor quantum dots in hierarchical photonic cellulose nanocrystal films: circularly polarized luminescent nanomaterials as optical coding labels**

Mingcong Xu,<sup>a</sup> Chunhui Ma,<sup>a</sup> Jin Zhou,<sup>b</sup> Yushan Liu,<sup>a</sup> Xueyun Wu,<sup>a</sup> Sha Luo,<sup>a</sup> Wei Li,<sup>\* a</sup>

Haipeng Yu,<sup>a</sup> Yonggui Wang,<sup>a</sup> Zhijun Chen,<sup>a</sup> Jian Li<sup>a</sup> and Shouxin Liu<sup>\*a</sup>

[a] Key laboratory of Bio-based Material Science and Technology of Ministry of Education,

Northeast Forestry University, Hexing Road 26, Harbin 150040, P. R. China

[b]CAS Key Laboratory of Nanosystem and Hierarchical Fabrication, National Center for

Nanoscience and Technology (NCNST), Beijing 100190, P. R. China.

E-mail: [liweil19820927@126.com](mailto:liweil19820927@126.com) ; [liushouxin@126.com](mailto:liushouxin@126.com)

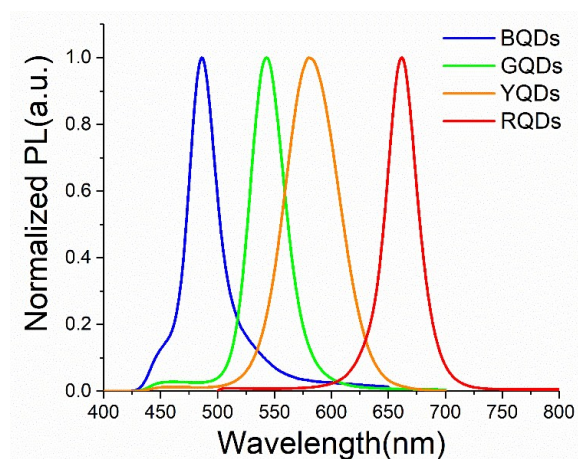

**Figure S1** Normalized fluorescence spectra of the ZnS/CdSe QDs dispersion with tunable emission wavelengths.

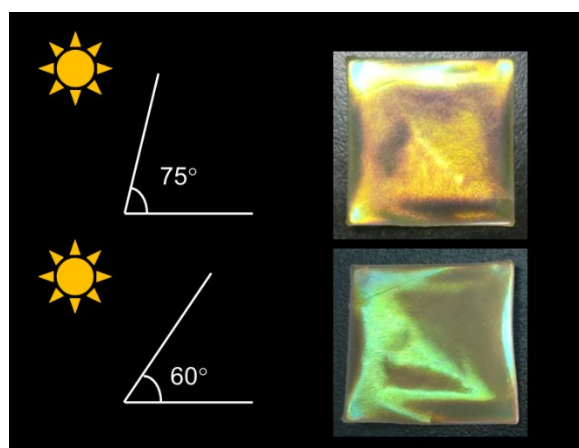

**Figure S2** Photographs of photonic film(G2-GQD) viewed under different angels.

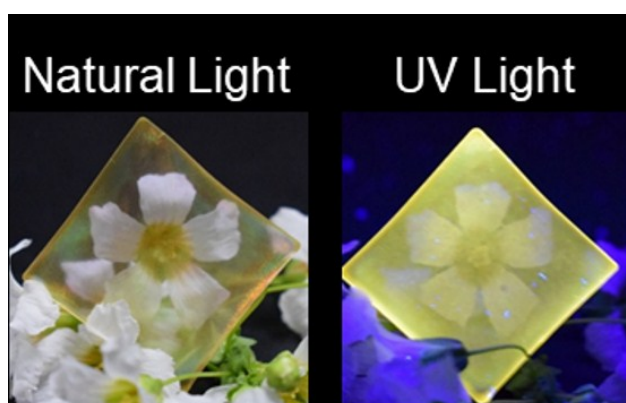

**Figure S3** Photographs of photonic film(G2-YQD) taken under natural light and UV light on a flower.

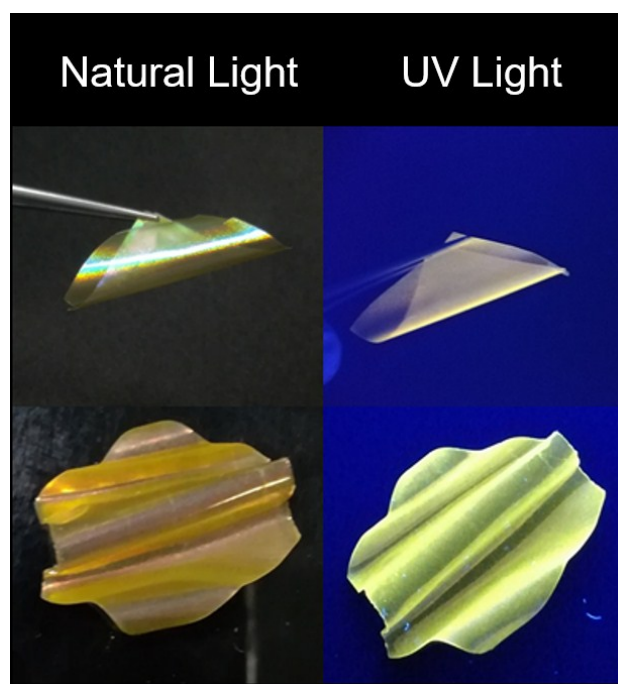

**Figure S4** Photographs of photonic film(G2-YQD) showing the flexibility taken under natural light and UV light.

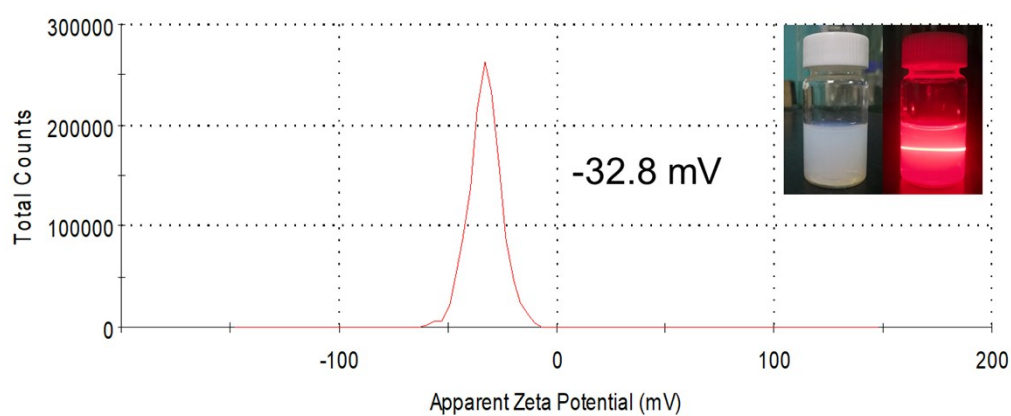

**Figure S5** Zeta potential distribution CNCs suspension. The inset is the CNCs suspension taken under natural light and a red laser.

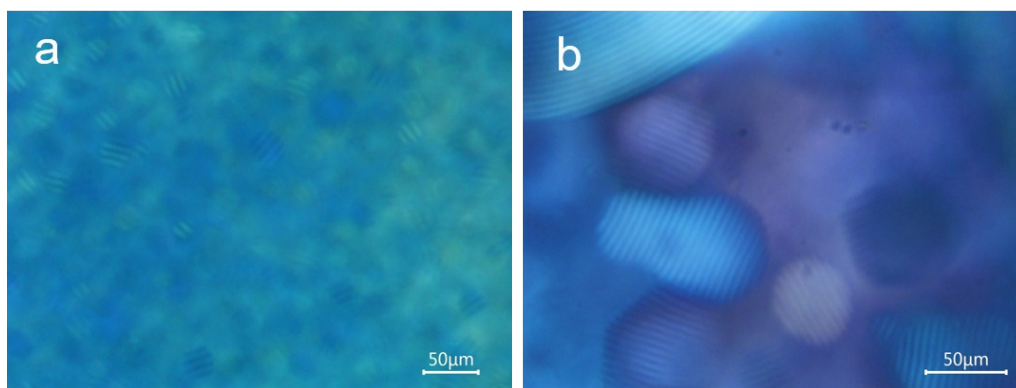

**Figure S6** POM image of concentrated composite suspension showing: (a) the formation of small anisotropic tactoids and (b) the fusing of tactoids.

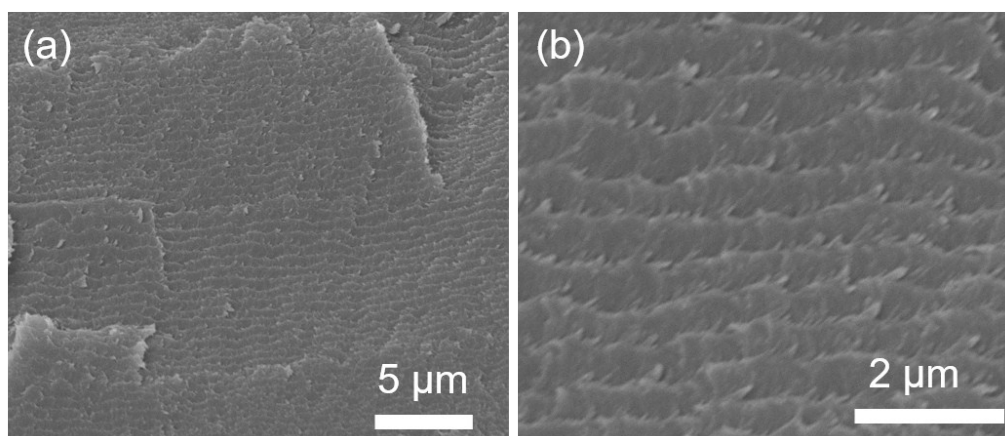

**Figure S7** Cross-sectional SEM image of CNC-GQD photonic film: (a) Low magnification SEM image; (b) High magnification SEM image.

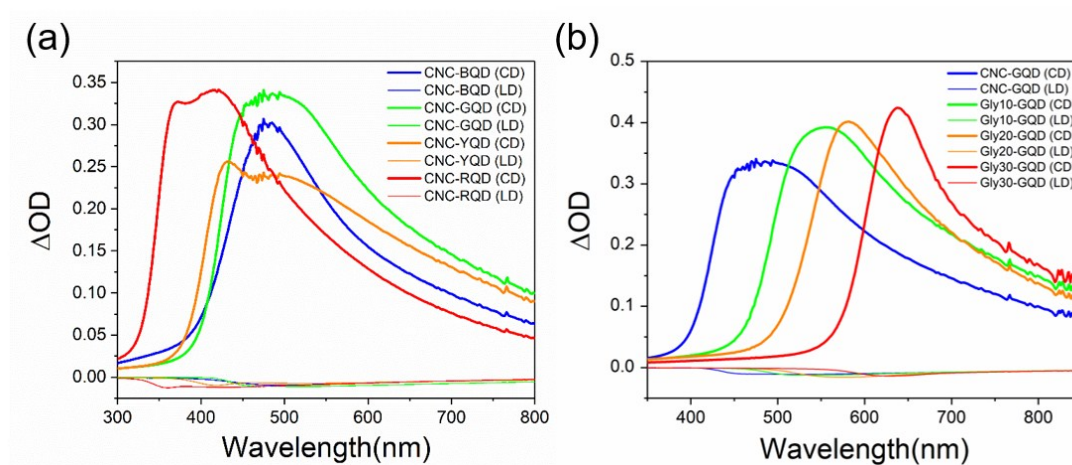

**Figure S8** (a) CD and LD spectrum of CNC photonic films containing different types of QDs. (b) CD and LD spectrum of photonic films with different glycerol content. The

measured LD spectra are unified as the same unit (mdeg) with CD spectra according to the below formula:<sup>1</sup> 1 mdeg =  $3.05 \times 10^{-5}$  OD.

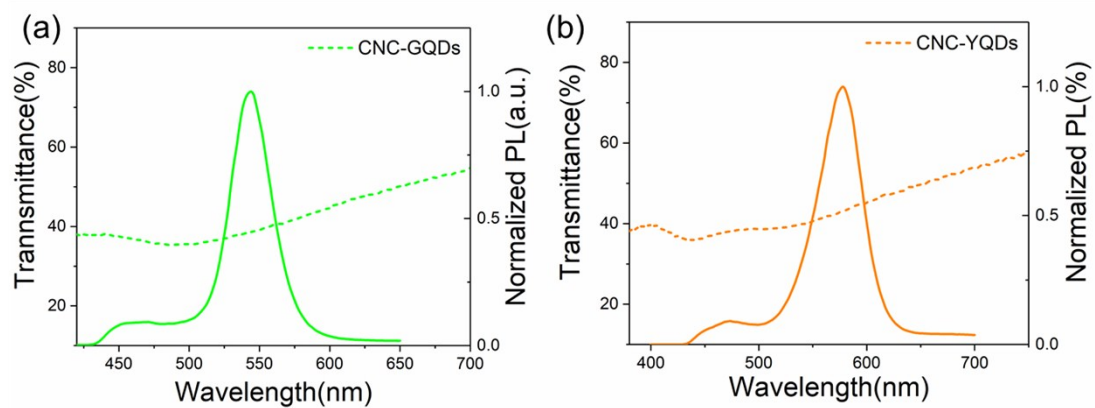

**Figure S9** (a) Left vertical axis is transmission spectra of CNC-GQDs, right vertical axis is the normalized PL spectra of CNC-GQDs. (b) Left vertical axis is transmission spectra of CNC-YQDs, right vertical axis is the normalized PL spectra of CNC-YQDs.

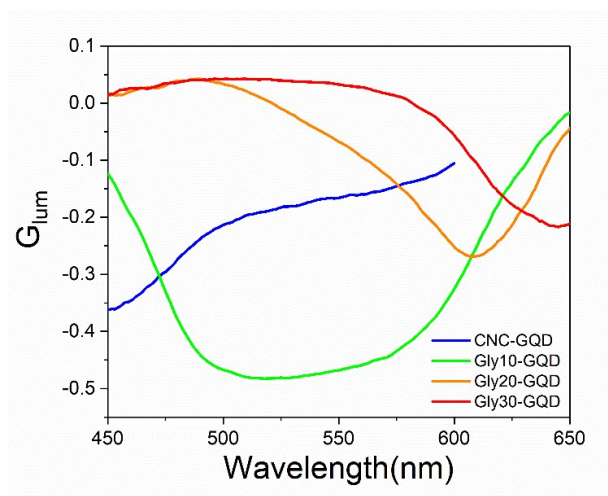

**Figure S10**  $G_{lum}$  curves of GQD photonic films with tunable PBGs.

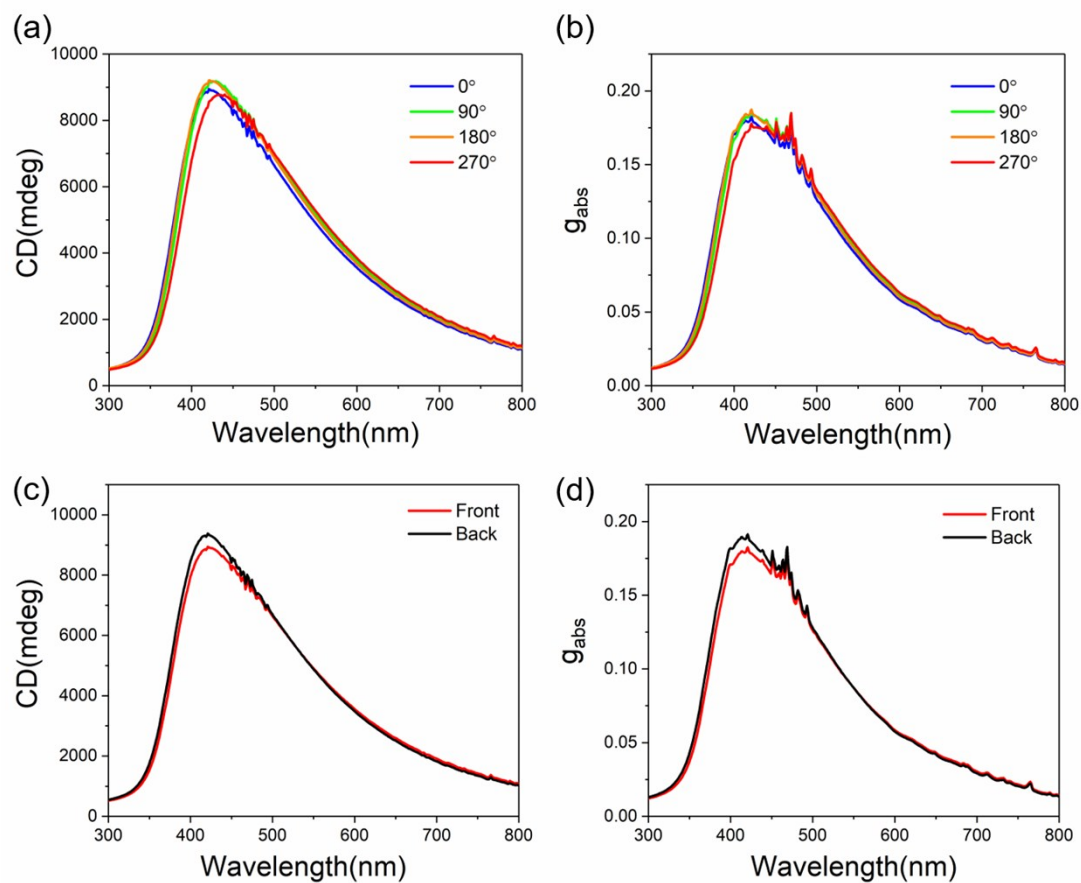

**Figure S11** (a) CD spectra of CNC-GQD film (55 μm) using different rotation angles. (b) Corresponding  $g_{abs}$ . (c) The “front-and-back” CD spectra of CNC-GQD film (55 μm). (d) Corresponding  $g_{abs}$ .



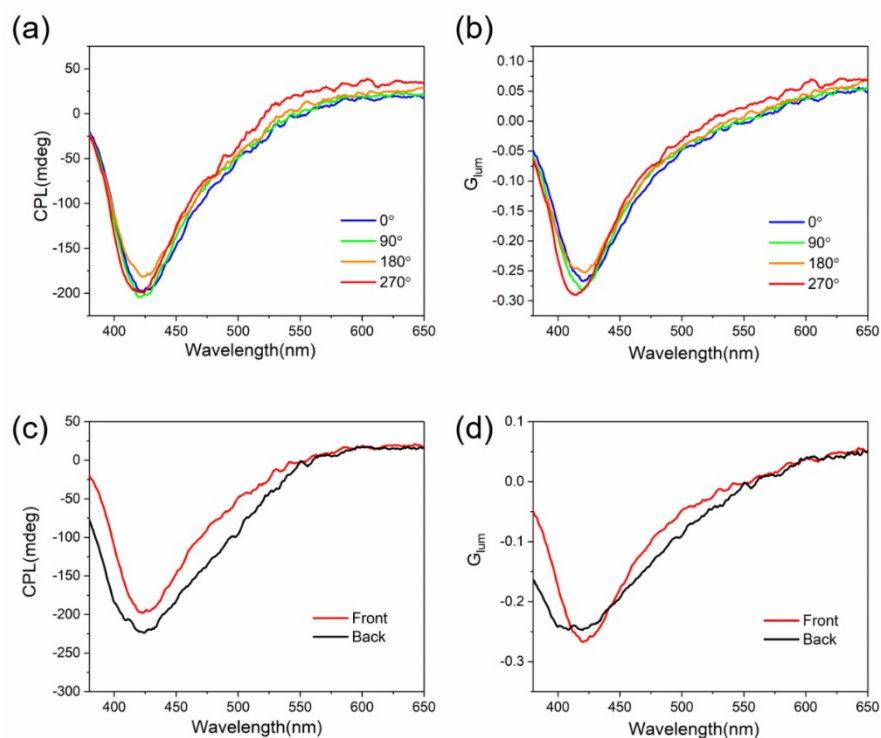

**Figure S12** (a) CPL spectra of CNC-GQD film (55μm) using different rotation angles. (b) Corresponding  $g_{lum}$ . (c) The “front-and-back” CPL spectra of CNC-GQD film(55μm). (d) Corresponding  $g_{lum}$ .

**Table S1** Optical properties of GQD photonic films with tunable PBGs.

| Sample    | $\lambda_{em}(nm)$ | $\lambda_{max}(PBG(nm))$ | maximum $g_{lum}$ |
|-----------|--------------------|--------------------------|-------------------|
| CNC-GQD   | 529                | 487                      | -0.36             |
| Gly10-GQD | 538                | 544                      | -0.48             |
| Gly20-GQD | 533                | 590                      | -0.26             |
| Gly30-GQD | 527                | 646                      | -0.21             |

## Reference

1. Y. Rong, P. Chen and M. Liu. Chem. Commun., 2013, **49**, 10498-10500.
